# Supplementary material for: Near-UV light emitting diode with on-chip photocatalysts for purification applications
Source: Royal Society of Chemistry journal article supplement (doi:10.1039/d2na00305h), 2022-01-01
Supplement: d2na00305h1.pdf [file d2na00305h1.pdf]

## **Near-UV Light Emitting Diode with On-Chip Photocatalysts for Purification Applications**

*Young-Chul Leem,<sup>a,b</sup> NoSoung Myoung,<sup>a</sup> Sang-Hyun Hong,<sup>b,c</sup> Sehee Jeong,<sup>b</sup> Okkyun Seo,<sup>d</sup> Seong-Ju Park,<sup>\*b,e</sup> Sang-Youp Yim,<sup>\*a</sup> and Joon Heon Kim<sup>\*a</sup>*

*<sup>a</sup>Advanced Photonics Research Institute, Gwangju Institute of Science and Technology, Gwangju 61005, Korea. E-mail: syim@gist.ac.kr; joonhkim@gist.ac.kr*

*<sup>b</sup>School of Materials Science and Engineering, Gwangju Institute of Science and Technology, Gwangju 61005, Korea.*

*<sup>c</sup>GIST Central Research Facilities, Gwangju Institute of Science and Technology, Gwangju 61005, Korea.*

*<sup>d</sup>Center for Synchrotron Radiation Research, Japan Synchrotron Radiation Research Institute (JASRI), 1-1-1, Kouto, Sayo, Hyogo 679-5198, Japan.*

*<sup>e</sup>School of Energy Engineering, Korea Institute of Energy Technology, Naju, Jeonnam 58217, Korea. E-mail: sjpark@kentech.ac.kr*

## Comparison of the surface-to-volume ratio of the zero-dimensional nanodisk vs. two-dimensional film structures

For a thin film with a thickness  $t$ , which is attached to the substrate on its one side, the surface-to-volume ratio is  $1/t$ .

For a nanodisk with a thickness  $t$  and a radius  $R$ , which is attached to the substrate on its one side, the surface-to-volume ratio is

$$\frac{\pi R^2 + 2\pi R t}{\pi R^2 t} = \frac{1}{t} + \frac{2}{R}$$

Therefore, for the case when the thickness is 1/4 of the diameter ( $R=2t$ ), the surface-to-volume ratio is  $2/t$ , which is two times larger than that of the film.

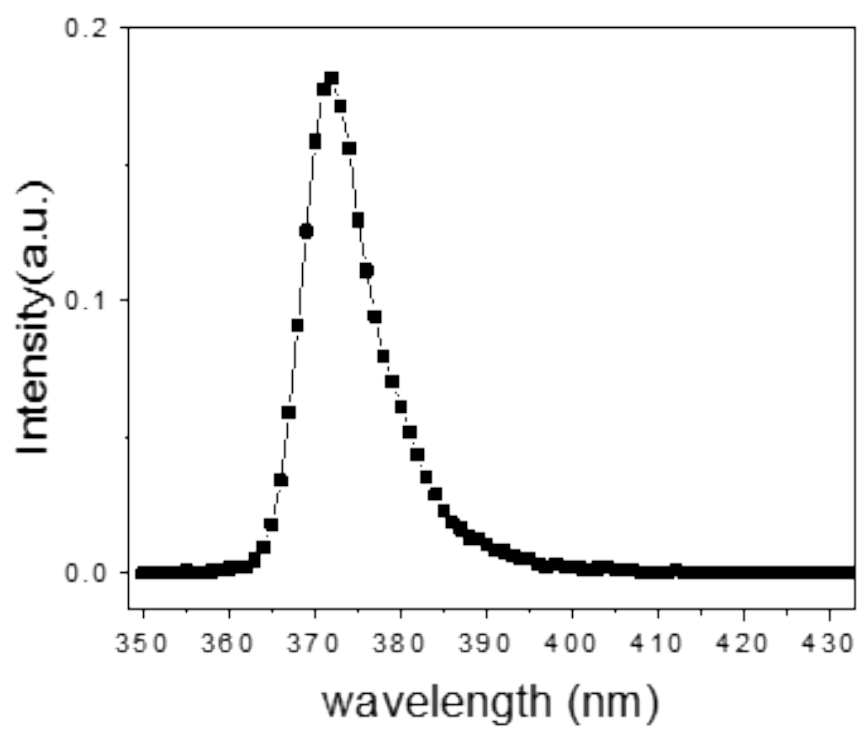

**Figure S1.** Spectrum of near-UV InGaN-based LED

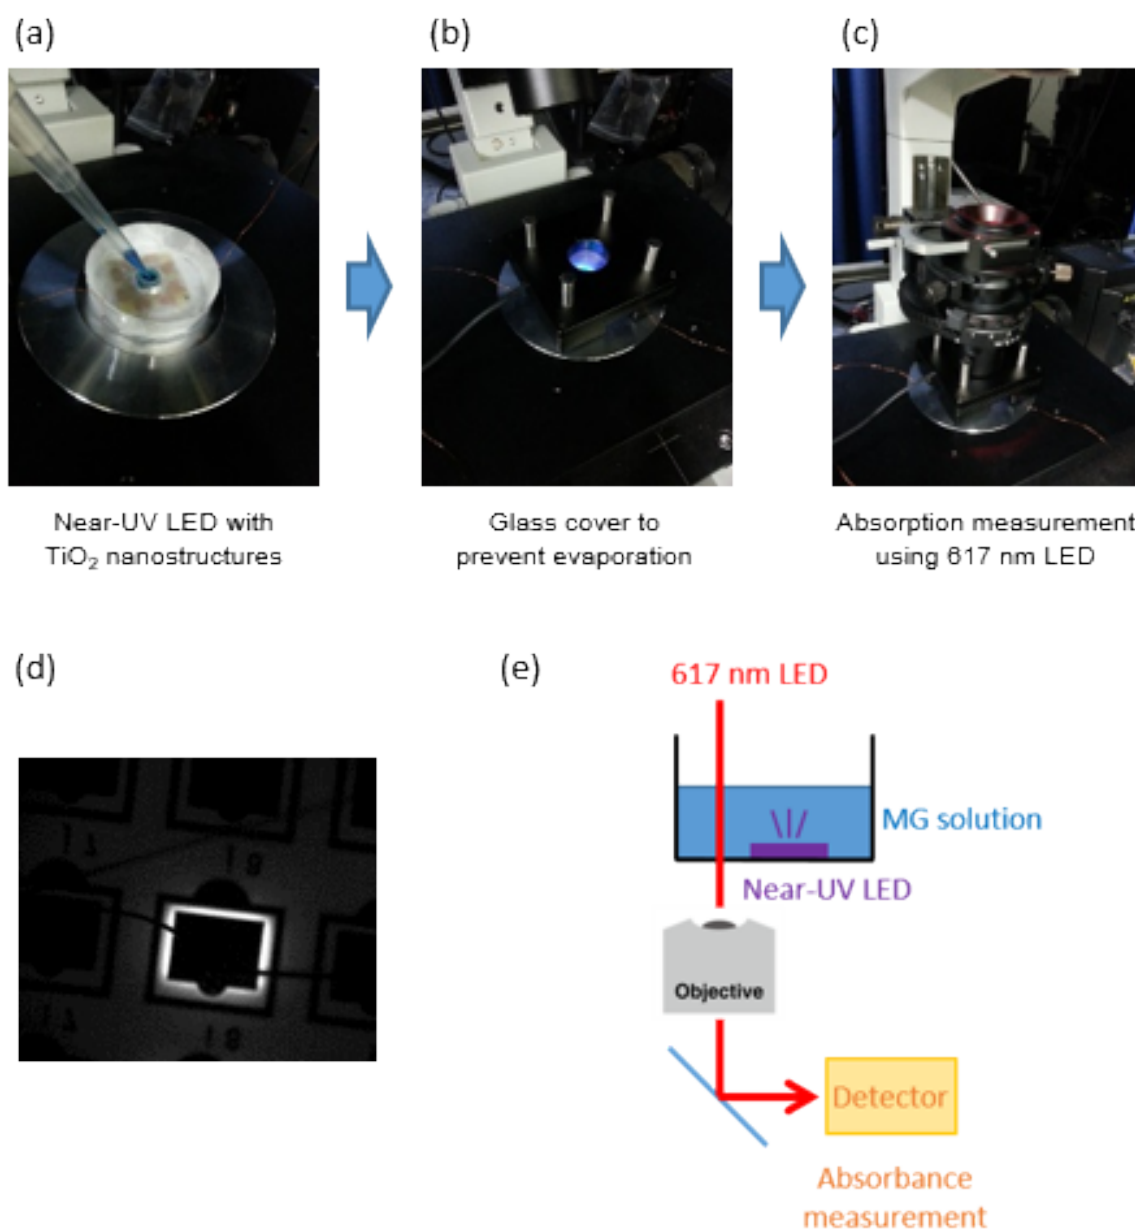

**Figure S2.** An experimental setup and sequential measurement process to measure photocatalytic degradation rates of MG by the near-UV LED with  $\text{TiO}_2$  nanostructures: (a) A cylindrical cell attached on the surface of the near-UV LED with  $\text{TiO}_2$  nanostructures was filled with MG aqueous solution with a concentration of 0.1 g/L. (b) A cylindrical cell filled with MG solution was covered by the glass to prevent the evaporation of the solution. Then, the near-UV LED was turned-on to induce photocatalytic degradation of MG after 1 h of equilibration for MG adsorption on the  $\text{TiO}_2$  structures in the dark. (c) The MG concentration

was measured at every 30 min based on the absorbance of the light from 617 nm visible LED, which is installed in the illumination pillar of the microscope. (d) Microscopic image of the near-UV LED. (e) Measurement scheme.

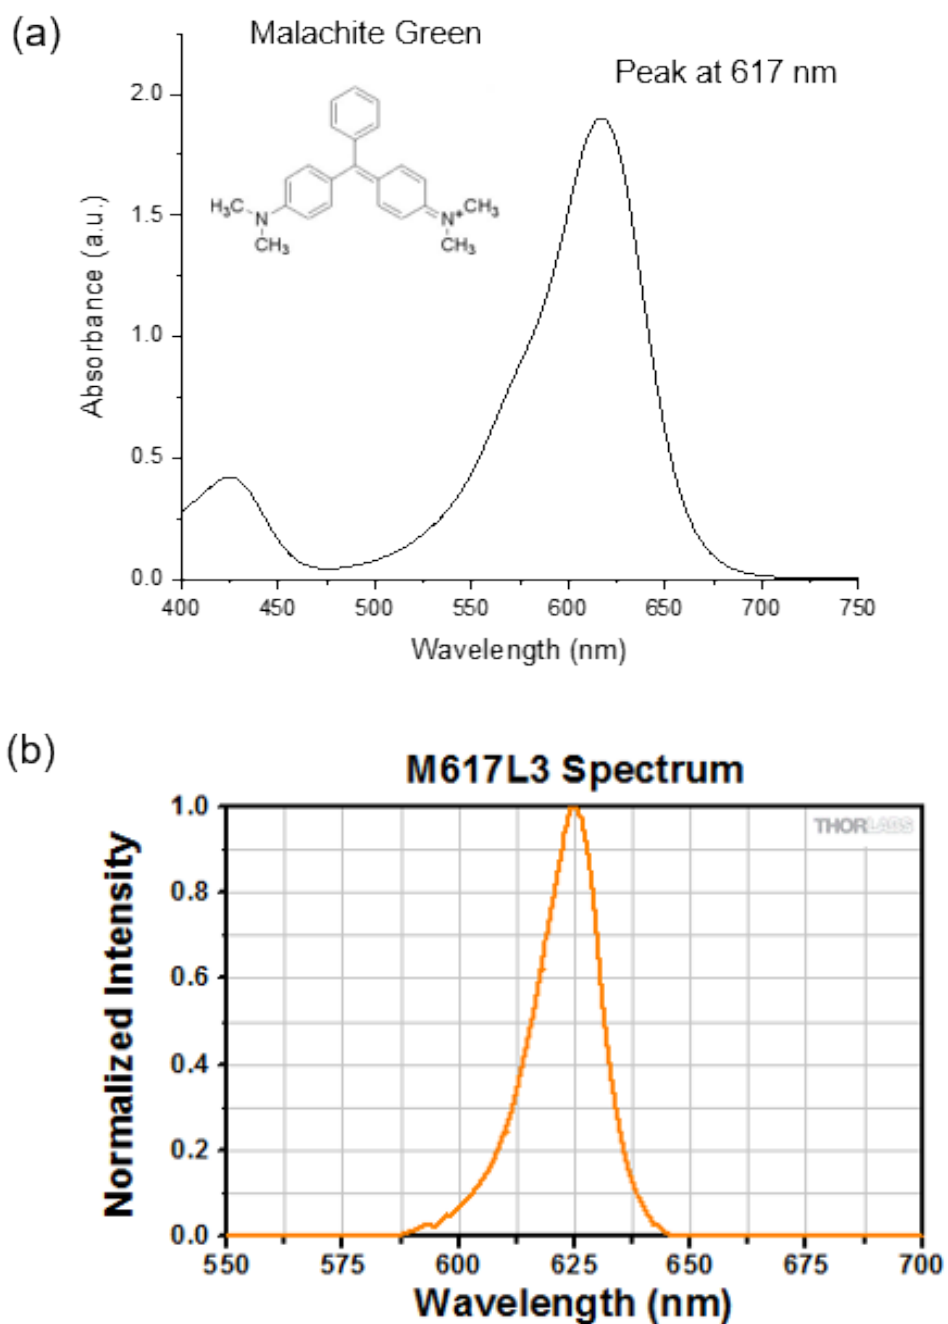

**Figure S3.** (a) Chemical structure and absorption spectrum of Malachite Green (MG) in water. (b) A spectrum of the visible LED with a nominal wavelength of 617 nm (THORLABS, M617L3) used to monitor the change of MG concentration in the photocatalytic degradation measurement. The spectrum was obtained from the THORLABS website.

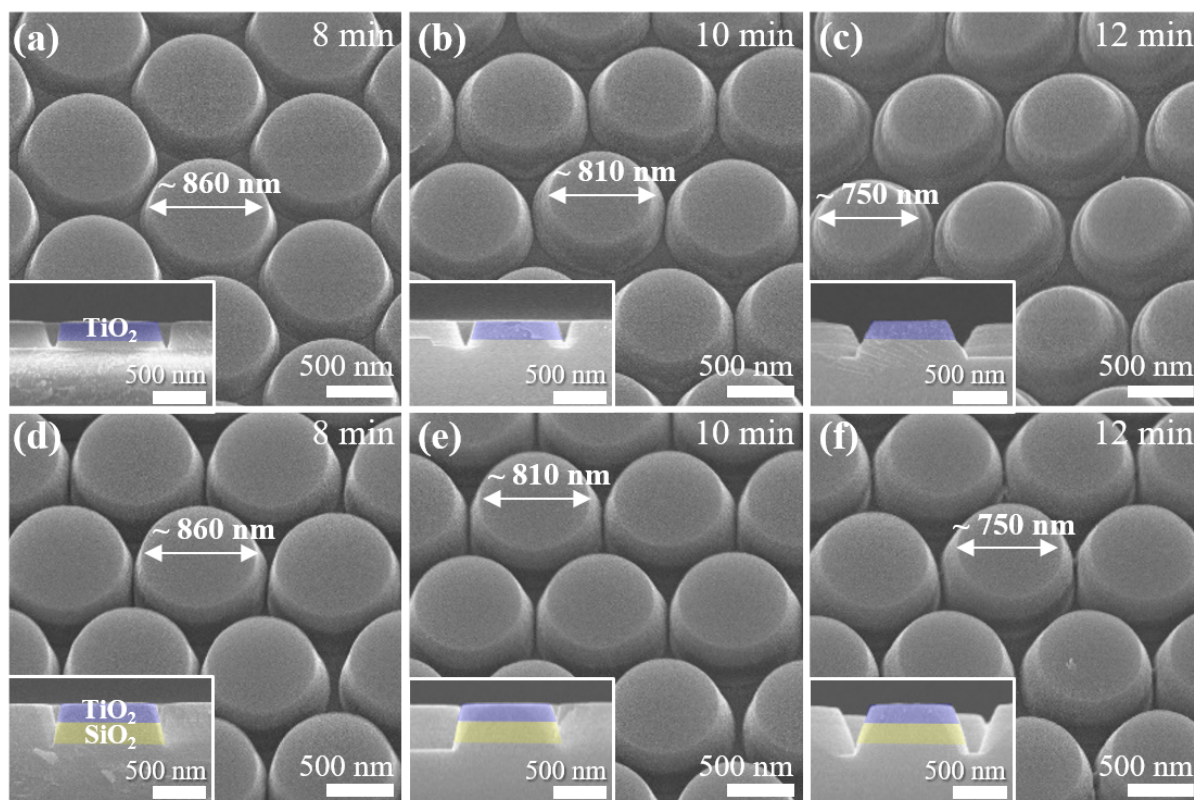

**Figure S4.** The bird's-eye view SEM images of (a-c) pristine  $\text{TiO}_2$  nanodisk array and (d-f)  $\text{TiO}_2/\text{SiO}_2$  nanodisk/pedestal array as a function of the ICP etching time. Insets are the corresponding cross-sectional SEM images of nanodisks. As the ICP etching time increased, the diameter of the  $\text{TiO}_2$  nanodisks gradually decreased.

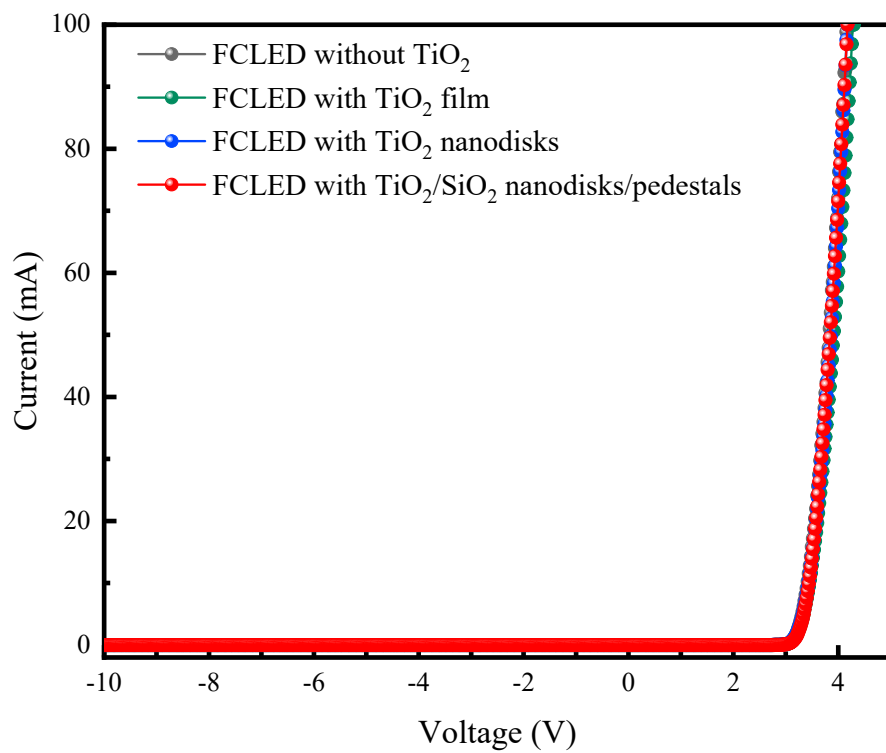

**Figure S5.** The current–voltage (I–V) characteristics of the near-UV LEDs with different  $\text{TiO}_2$  nanostructures.

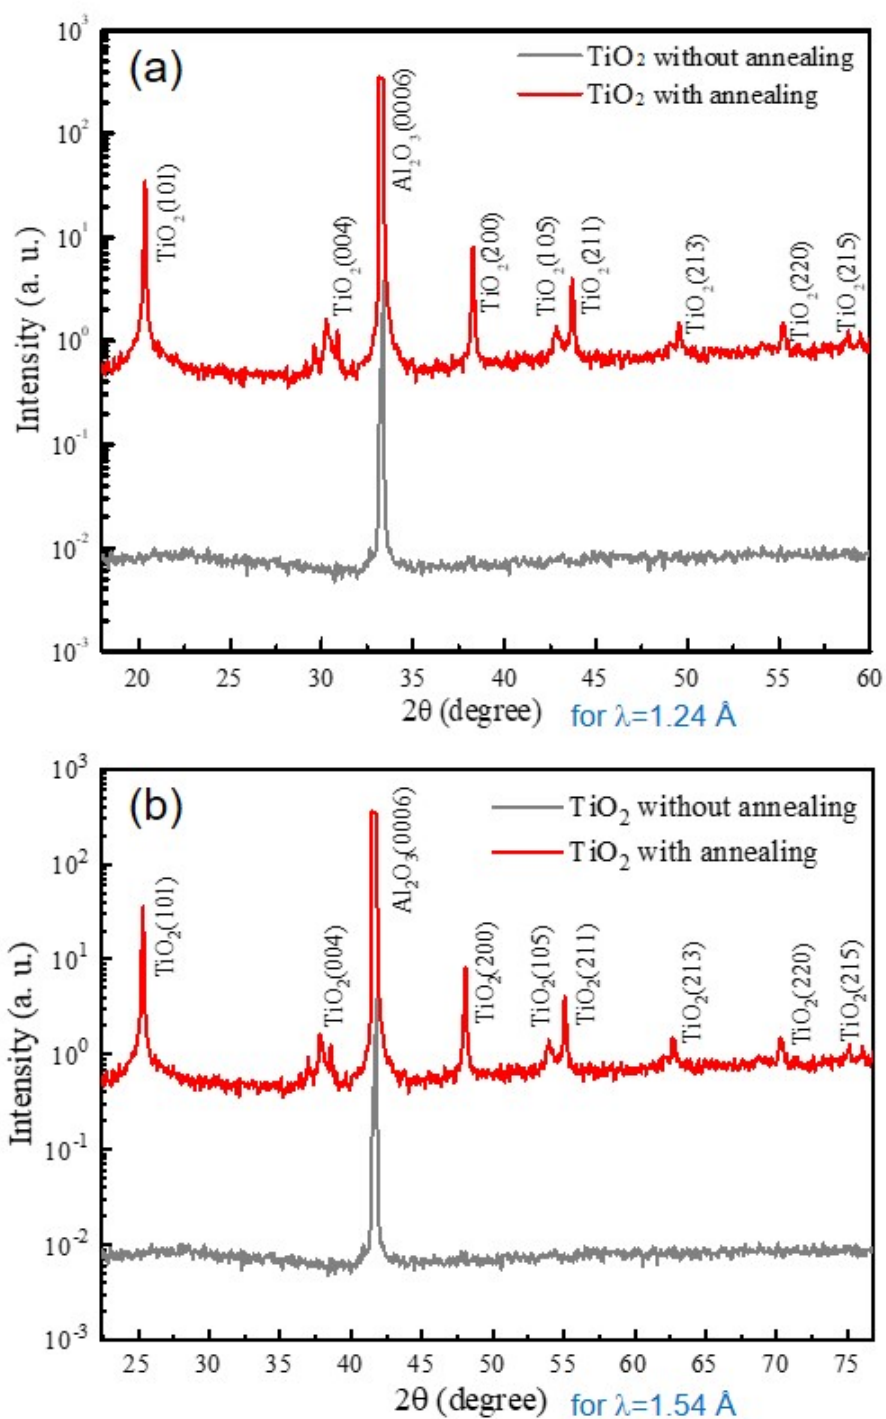

**Figure S6.** Indexing of XRD peaks. (a) A synchrotron X-ray source ( $1.24 \text{ \AA}$ ) was used in our experiment. (B) The replotted XRD graph with the  $2\theta$  recalculated for the frequently used Cu K $\alpha$  ( $1.54 \text{ \AA}$ ) source for more convenient indexing of XRD peaks.

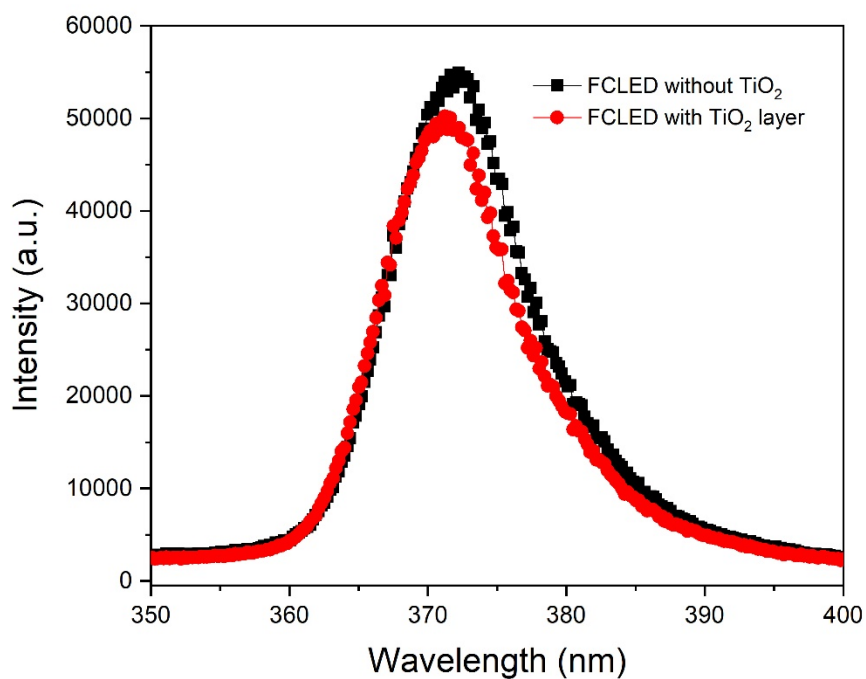

**Figure S7.** The light intensity measured from FCLEDs at the injection current of 20 mA. After application of TiO<sub>2</sub> layer, the extracted light intensity was decreased about 8.8%, which is probably attributed to the absorption of UV light by TiO<sub>2</sub> layer.
